# Supplementary material for: Compositional Data Analysis in Time-Use Epidemiology: What, Why, How
Source: MDPI journal article supplement (doi:10.3390/ijerph17072220), 2020-03-26
Supplement: s1 [file s1]

## Supplementary File: The Longitudinal Study of Australian Children

The Longitudinal Study of Australian Children (LSAC), also known as Growing Up in Australia, is a nationally-representative longitudinal study initiated in 2003. The study is funded by the Australian Government and conducted in partnership between the Australian Government Department of Social Services, the Australian Institute of Family Studies and the Australian Bureau of Statistics, with advice provided by a consortium of leading researchers.

The sample was selected from the Medicare enrolment database held by the Health Insurance Commission. Children of the appropriate ages were selected and sent an 'invitation to participate' letter to the Medicare cardholder, along with a brochure about the study. Families were given four weeks to withdraw from the study.

There are two cohorts. A birth cohort of 5112 children aged 3-15 months at the start of the study and a child cohort of 4991 children aged 4-5 years at the start of the study. The cohorts are followed up every two years.

In the main paper, we use data from Wave 6 of the birth cohort (2013-2014), when the children were 10-11 years old. Data from Wave 3 (2007-2008) were also referenced.

### Time-use diaries: Wave 6 Birth Cohort

In Wave 6, time-diaries were completed by the child participants [1]. The diaries captured the previous day, and only one day was recorded for each participant. The recorded day could be either weekday, weekend-day, school day or holiday.

Children were provided a paper-based diary (see Figure 1) and a pen with a digital clock. They were asked to record what they did throughout the day, and at what time they did it. After children completed their diary, they were visited by a research assistant (interviewer), who talked the child through the diary and attempted to fill in any missing information.

The image shows two pages of a spiral-bound diary. The left page has a blue background with a white box at the top for 'Day' and 'Date'. Below this is a section titled 'What time did you wake up?' with a time input field. A green box labeled 'Before 9:00am' contains a cartoon character and instructions to 'Put stickers here if you had something to eat or drink'. It has columns for 'What time is it?' and 'What did you do?'. The right page has a pink background with a section titled 'What time did you go to bed?' with a time input field. It also has a cartoon character and a section for recording activities.

Figure 1. Excerpts from paper-based time-use diary used in Wave 6 of the Longitudinal Study of Australian Children, Birth cohort.

The research assistant coded the child's recorded activities into activity codes (Table 1). For the purposes of the example in the main paper, we further collapsed these activity codes into three categories – Sleep, sedentary behavior and physical activity, as shown in Table 1. Children were considered to have valid data if they had >288 minutes and <864 minutes sleep, >144 minutes sedentary behavior and >10 minutes physical activity.

Table 1. Classification of Wave 6 Birth Cohort Activity Codes into Physical Activity, Sedentary Behaviour and Sleep.

| <b>Activity Code</b>                       | <b>Classification</b> | <b>Activity Code</b>                               | <b>Classification</b> |
|--------------------------------------------|-----------------------|----------------------------------------------------|-----------------------|
| Attend courses excluding school university | Sedentary Behaviour   | Home maintenance                                   | Physical Activity     |
| Attendance at concert theatre              | Sedentary Behaviour   | Hospitality including fast food                    | Physical Activity     |
| Attendance at movies cinema                | Sedentary Behaviour   | Household management other                         | Physical Activity     |
| Attending live sporting events             | Sedentary Behaviour   | Laundry clothes care                               | Physical Activity     |
| By private motor vehicle bike              | Sedentary Behaviour   | Packing                                            | Physical Activity     |
| By public chartered transport              | Sedentary Behaviour   | Personal care medical health care                  | Physical Activity     |
| Clerical office                            | Sedentary Behaviour   | Personal care                                      | Physical Activity     |
| Communication                              | Sedentary Behaviour   | Playing musical instruments or singing for leisure | Physical Activity     |
| Creating maintaining websites              | Sedentary Behaviour   | Pool care chores                                   | Physical Activity     |
| Dentist orthodontist                       | Sedentary Behaviour   | Private music lessons practice academic tutoring   | Physical Activity     |
| Doctor                                     | Sedentary Behaviour   | Purchasing administrative services                 | Physical Activity     |
| Doing homework electronic device           | Sedentary Behaviour   | Purchasing consumer goods                          | Physical Activity     |
| Doing homework not via electronic devices  | Sedentary Behaviour   | Purchasing other services                          | Physical Activity     |
| Doing nothing                              | Sedentary Behaviour   | Purchasing personal care services                  | Physical Activity     |

|                                     |                     |                                       |                   |
|-------------------------------------|---------------------|---------------------------------------|-------------------|
| Downloading posting media           | Sedentary Behaviour | Rubbish recycling                     | Physical Activity |
| Eating drinking                     | Sedentary Behaviour | Selling disposing of household assets | Physical Activity |
| Electronic device use               | Sedentary Behaviour | Shopping                              | Physical Activity |
| Filling out the diary               | Sedentary Behaviour | Showering bathing                     | Physical Activity |
| General application use             | Sedentary Behaviour | Taking care of siblings chores        | Physical Activity |
| General internet browsing           | Sedentary Behaviour | Talking face to face                  | Physical Activity |
| Getting dressed getting ready       | Sedentary Behaviour | Unstructured non active play          | Physical Activity |
| Internet shopping                   | Sedentary Behaviour | Volunteering work                     | Physical Activity |
| Listening to music                  | Sedentary Behaviour | Walking pets playing with pets        | Physical Activity |
| Medical health care                 | Sedentary Behaviour | Window-shopping                       | Physical Activity |
| Negative face to face communication | Sedentary Behaviour | Work other                            | Physical Activity |
| Non active activities               | Sedentary Behaviour | Working in a family business or farm  | Physical Activity |
| Non-verbal interaction              | Sedentary Behaviour | Active activities                     | Physical Activity |
| Nothing                             | Sedentary Behaviour | Active club activities                | Physical Activity |
| Online chatting instant messaging   | Sedentary Behaviour | Archery shooting sports               | Physical Activity |
| Physiotherapist chiropractor        | Sedentary Behaviour | Archery shooting sports individual    | Physical Activity |
| Playing games electronic device     | Sedentary Behaviour | Archery shooting sports unstructured  | Physical Activity |
| Playing games electronic device nod | Sedentary Behaviour | Athletics gymnastics                  | Physical Activity |

|                                             |                     |                                                      |                   |
|---------------------------------------------|---------------------|------------------------------------------------------|-------------------|
| Reading or being read to for leisure        | Sedentary Behaviour | Athletics gymnastics individual                      | Physical Activity |
| Religious groups                            | Sedentary Behaviour | Athletics gymnastics unstructured                    | Physical Activity |
| Religious practice                          | Sedentary Behaviour | Ball sports                                          | Physical Activity |
| Religious activities ritual ceremonies      | Sedentary Behaviour | Ball sports individual                               | Physical Activity |
| School lessons                              | Sedentary Behaviour | Ball sports unstructured                             | Physical Activity |
| Spending time on social networking sites    | Sedentary Behaviour | By foot                                              | Physical Activity |
| Talking on a landline phone                 | Sedentary Behaviour | By bike scooter skateboard etc.                      | Physical Activity |
| Talking on a mobile phone                   | Sedentary Behaviour | Car boat bike care                                   | Physical Activity |
| Texting emailing                            | Sedentary Behaviour | Car washing work                                     | Physical Activity |
| Travel                                      | Sedentary Behaviour | Cleaning grounds garage shed outside of house chores | Physical Activity |
| Video chatting                              | Sedentary Behaviour | Cleaning tidying                                     | Physical Activity |
| Watching TV programs or movies videos       | Sedentary Behaviour | Fitness gym exercise                                 | Physical Activity |
| Weddings funerals rites of passage          | Sedentary Behaviour | Fitness gym exercise individual                      | Physical Activity |
| Animal care                                 | Physical Activity   | Fitness gym exercise unstructured                    | Physical Activity |
| Animal care work                            | Physical Activity   | Gardening lawn mowing                                | Physical Activity |
| Arts                                        | Physical Activity   | Gardening maintenance chores                         | Physical Activity |
| Attendance at museum exhibition art gallery | Physical Activity   | Labourers and related workers                        | Physical Activity |
| Attendance at other mass events             | Physical Activity   | Martial arts dancing                                 | Physical Activity |

|                                                 |                      |                                                    |                      |
|-------------------------------------------------|----------------------|----------------------------------------------------|----------------------|
| Attendance at zoo animal park<br>botanic garden | Physical<br>Activity | Martial arts dancing individual                    | Physical<br>Activity |
| Babysitting                                     | Physical<br>Activity | Martial arts dancing unstructured                  | Physical<br>Activity |
| Chess card paper and board games<br>crosswords  | Physical<br>Activity | Motor sports roller sports cycling                 | Physical<br>Activity |
| Chores                                          | Physical<br>Activity | Motor sports roller sports cycling<br>individual   | Physical<br>Activity |
| Cleaning teeth                                  | Physical<br>Activity | Motor sports roller sports cycling<br>unstructured | Physical<br>Activity |
| Clothes making                                  | Physical<br>Activity | Organised individual sport and<br>training other   | Physical<br>Activity |
| Clubs                                           | Physical<br>Activity | Organised team sports and<br>training other        | Physical<br>Activity |
| Design home improvement                         | Physical<br>Activity | Umpiring work                                      | Physical<br>Activity |
| Food drink clean up                             | Physical<br>Activity | Unstructured active play other                     | Physical<br>Activity |
| Food drink preparation                          | Physical<br>Activity | Water ice snow sports                              | Physical<br>Activity |
| Games of chance gambling                        | Physical<br>Activity | Water ice snow sports individual                   | Physical<br>Activity |
| Going out                                       | Physical<br>Activity | Water ice snow sports<br>unstructured              | Physical<br>Activity |
| Handwork crafts excluding<br>clothes making     | Physical<br>Activity | Sleeping napping not end of day<br>bed time        | Sleep                |
| Heat water power upkeep                         | Physical<br>Activity | Sleep                                              | Sleep                |
| Hobbies collections                             | Physical<br>Activity |                                                    |                      |

### Time-use diaries: Wave 3 Birth Cohort

In Wave 3, a parent/guardian was asked to complete a paper-based time-use diary for two days. The diary had a different format to the Wave 6 diary (Figure 2).

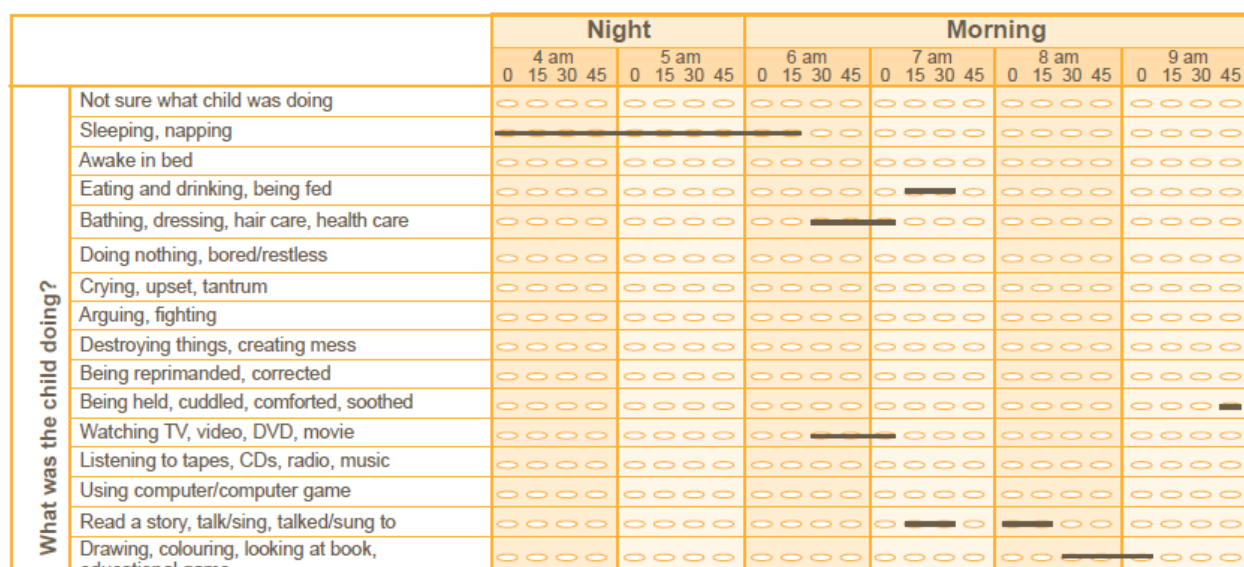

Figure 2. Example of a completed Wave 3 (Birth Cohort) time-use diary.

For the purposes of the main paper, we classified the activities into three categories – physical activity, sedentary behavior and sleep (Table 2), and averaged the time spent in these activities across the two recorded days.

Table 2. Classification of Wave 3 Birth Cohort Activity Codes into Physical Activity, Sedentary Behaviour and Sleep.

| Activity                                              | Classification      |
|-------------------------------------------------------|---------------------|
| Not sure                                              | NA                  |
| Sleeping, napping                                     | Sleep               |
| Awake in bed                                          | Sedentary Behaviour |
| Doing nothing, bored restless                         | Sedentary Behaviour |
| Bathing, dressing, hair care, health care             | Physical Activity   |
| Eating and drinking, being fed                        | Sedentary Behaviour |
| Crying, upset, tantrum                                | Physical Activity   |
| Destroying things, create mess                        | Physical Activity   |
| Arguing, fighting                                     | Physical Activity   |
| Being reprimanded, corrected                          | Physical Activity   |
| Held, cuddled, comforted soothed                      | Sedentary Behaviour |
| Watching TV, video or DVD                             | Sedentary Behaviour |
| Listening to tapes, CDs, radio, music                 | Sedentary Behaviour |
| Using computer/computer game                          | Sedentary Behaviour |
| Being read to, told a story, or sung to               | Sedentary Behaviour |
| Drawing, colouring, looking at book, educational game | Physical Activity   |
| Quiet free play (eg jigsaw, craft, dress-up)          | Physical Activity   |
| Active free play (running, climbing, ball game)       | Physical Activity   |
| Being taught to do chores, read etc                   | Physical Activity   |
| Visiting people, special event, outing                | Physical Activity   |

|                                      |                     |
|--------------------------------------|---------------------|
| Organised lesson/activity            | Physical Activity   |
| Walk for travel or fun               | Physical Activity   |
| Travel in pusher or bike seat        | Sedentary Behaviour |
| Travel in car                        | Sedentary Behaviour |
| Public transport                     | Sedentary Behaviour |
| Ride bike, trike etc (travel or fun) | Physical Activity   |

### **Anthropometric measurements in Wave 6**

In the main paper, we explore the relationship between Wave 6 time use and body mass index (BMI) z-score. BMI was calculated as weight/height squared ( $\text{kg/m}^2$ ). Children's weight in light clothing to the nearest 50g was measured by trained interviewers using glass bathroom scales. The interviewer measured child height twice, without shoes, to the nearest 0.1cm using a portable rigid stadiometer. The average of the two measurements was used; where they differed by more than 0.5cm, a third measurement was taken and the average of the closest two was used. The raw BMI were transformed using the 2000 US Centers for Disease Control (CDC) growth reference data [2]

### **Measurement of covariates**

The participating child's exact age was obtained from their Medicare records, and their sex from parental survey. Socioeconomic position was captured using a previously constructed composite z-score which included parent-reported information about household income, parental education and parental employment [3].

### **Wave 6 participant characteristics**

The analyses in the main paper included participants in the Wave 6 Birth cohort with complete and valid data for activity composition, BMI, sex, age and socioeconomic position (n=3228). Characteristics of included participants are shown in Table 3.

| Characteristic                 |                                       | Summary statistics<br>(n=3228) |
|--------------------------------|---------------------------------------|--------------------------------|
| Sex (n, %)                     | Male                                  | 1638 (51)                      |
|                                | Female                                | 1590 (49)                      |
| Age (y) (mean (SD))            |                                       | 10.9 (0.3)                     |
| Socioeconomic position z-score |                                       | 0.0 (1.0)                      |
| Body mass index z-score        |                                       | 0.3 (1.0)                      |
| Activity composition (%)       | [Sleep; Sedentary; Physical Activity] | [43; 38; 19]                   |

## References

1. Corey, J.; Gallagher, J.; Davis, E.; Marquardt, M. *The times of their lives: Collecting time use data from children in the longitudinal study of australian children (lsac). Technical paper 13.*; Australian Bureau of Statistics, 2014.
2. Kuczmarski, R.; Ogden, C.; Guo, S.; Grummer-Strawn, L.; Flegal, K.; Mei, Z.; al, e. 2000 cdc growth charts for the united states: Methods and development. *Vital and Health Statistics: Series 11. Data From the National Health Survey* **2002**, 246, 1-190.
3. Blakemore, T.; Strazdins, L.; Gibbings, J. Measuring family socioeconomic position. *Australian Social Policy* **2009**, 8, 121-168.
